# Supplementary material for: Observation of Coulomb gap in the quantum spin Hall candidate single-layer 1T’-WTe2
Source: PubMed Central journal article supplement (PMC6172222; doi:10.1038/s41467-018-06635-x), 2018-10-04
Supplement: 41467_2018_6635_MOESM1_ESM.pdf [file 41467_2018_6635_MOESM1_ESM.pdf]

# Observation of Coulomb gap in the quantum spin Hall candidate single-layer $1T'$ -WTe<sub>2</sub>

Ye-Heng Song<sup>1†</sup>, Zhen-Yu Jia<sup>1†</sup>, Dongqin Zhang<sup>1</sup>, Xin-Yang Zhu<sup>1</sup>, Zhi-Qiang Shi<sup>1</sup>, Huaiqiang Wang<sup>1</sup>, Li Zhu<sup>1</sup>, Qian-Qian Yuan<sup>1</sup>, Haijun Zhang<sup>1,2</sup>, Ding-Yu Xing<sup>1,2</sup>, Shao-Chun Li<sup>1,2\*</sup>

1. National Laboratory of Solid State Microstructures, School of Physics, Nanjing University, Nanjing 210093, China

2. Collaborative Innovation Center of Advanced Microstructures, Nanjing University, Nanjing 210093, China

<sup>†</sup> These authors contributed equally to this work.

\* email: scli@nju.edu.cn

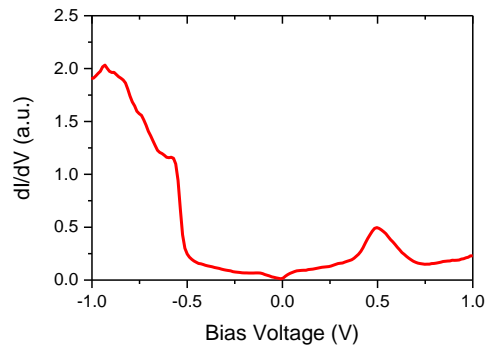

**Supplementary Figure 1.**  $dI/dV$  spectrum ( $U = +500$  mV,  $I_t = 200$  pA) taken on the single-layer  $1T'$ -WTe<sub>2</sub> in the bias range from -1.0 V to +1.0 V.

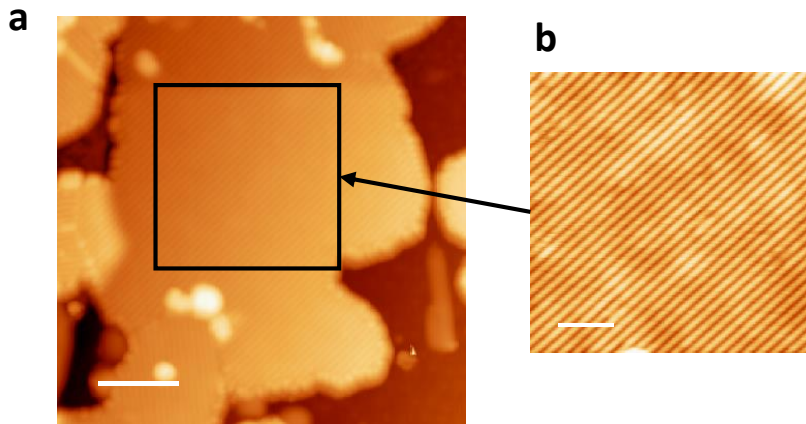

**Supplementary Figure 2.** STM topographic images of the monolayer  $1T'$ -WTe<sub>2</sub> where  $dI/dV$  maps are taken. (a) STM image of the monolayer  $1T'$ -WTe<sub>2</sub> island ( $U = +1.0$  V,  $I_t = 100$  pA). The scale bar is 8 nm. The black square frame marks the area where the  $dI/dV$  maps are taken. (b) Zoom in area as marked in (a) ( $U = +0.2$  V,  $I_t = 100$  pA). The scale bar corresponds to 3.6 nm.

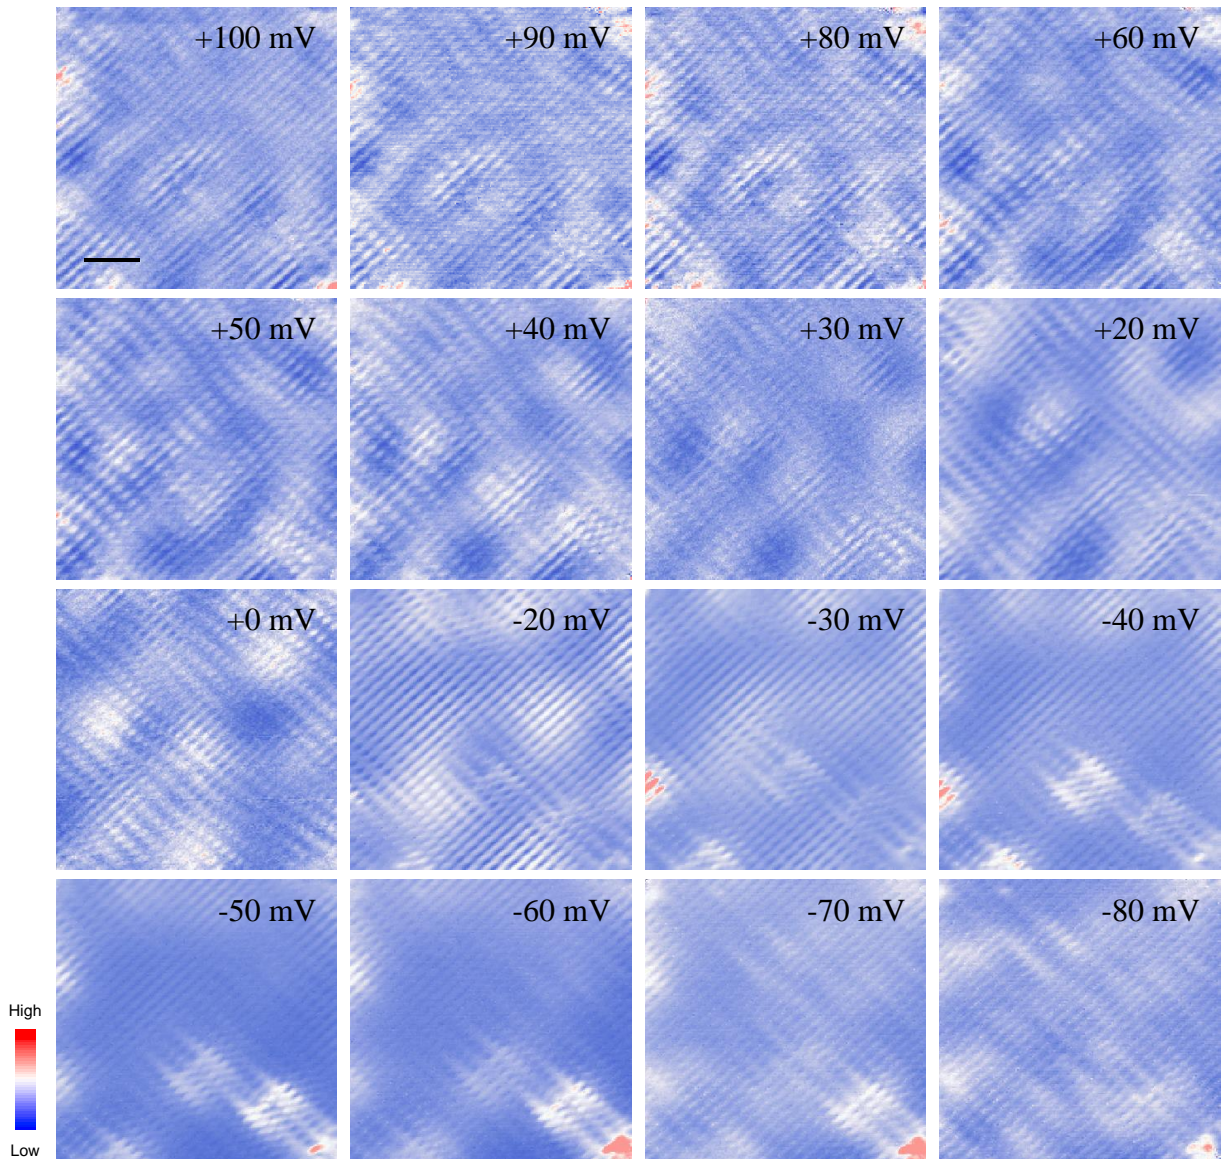

**Supplementary Figure 3.** The experimental  $dI/dV$  maps taken at various bias voltages on the region as marked in Supplementary Figure 2. The bias voltage is labeled in each image (each  $dI/dV$  map is taken at the bias as is labeled and  $I_t = 100$  pA except for the map at 0 mV. The  $dI/dV$  map for 0 mV is taken at  $U = +30$  mV and  $I_t = 100$  pA. The scale bar corresponds to 3.6 nm.

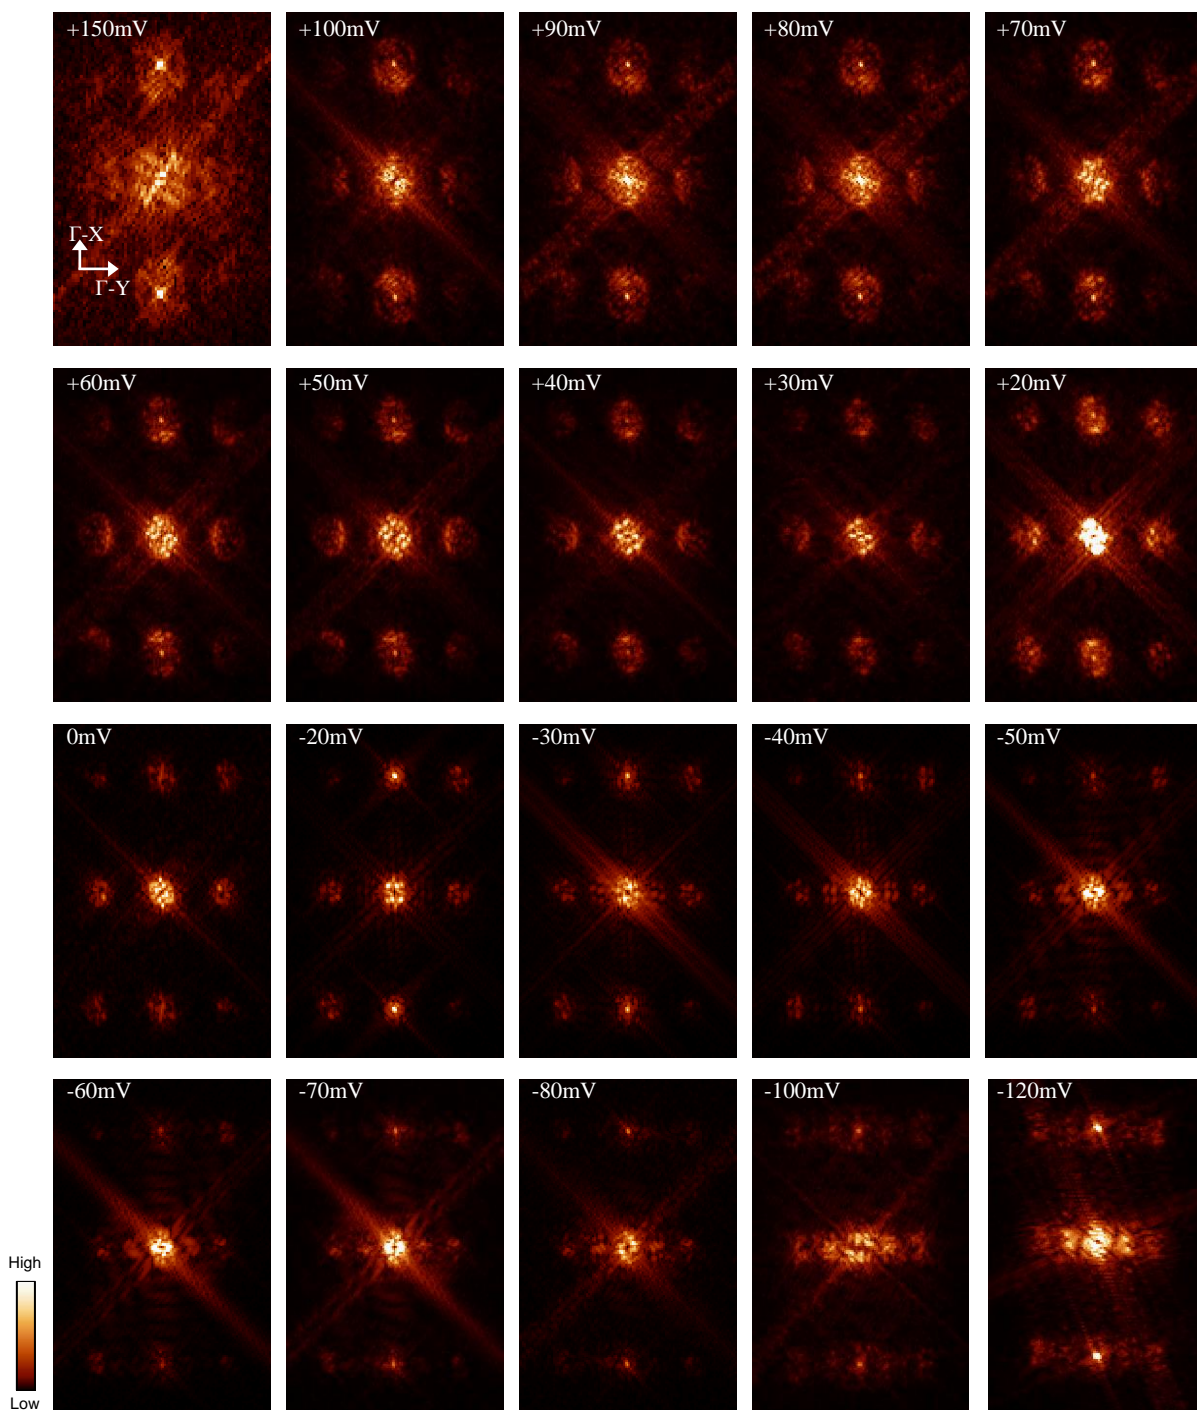

**Supplementary Figure 4.** FFT images (without symmetrization process) showing the evolution of the QPI patterns with bias voltage. The bias voltage is labeled in each image.

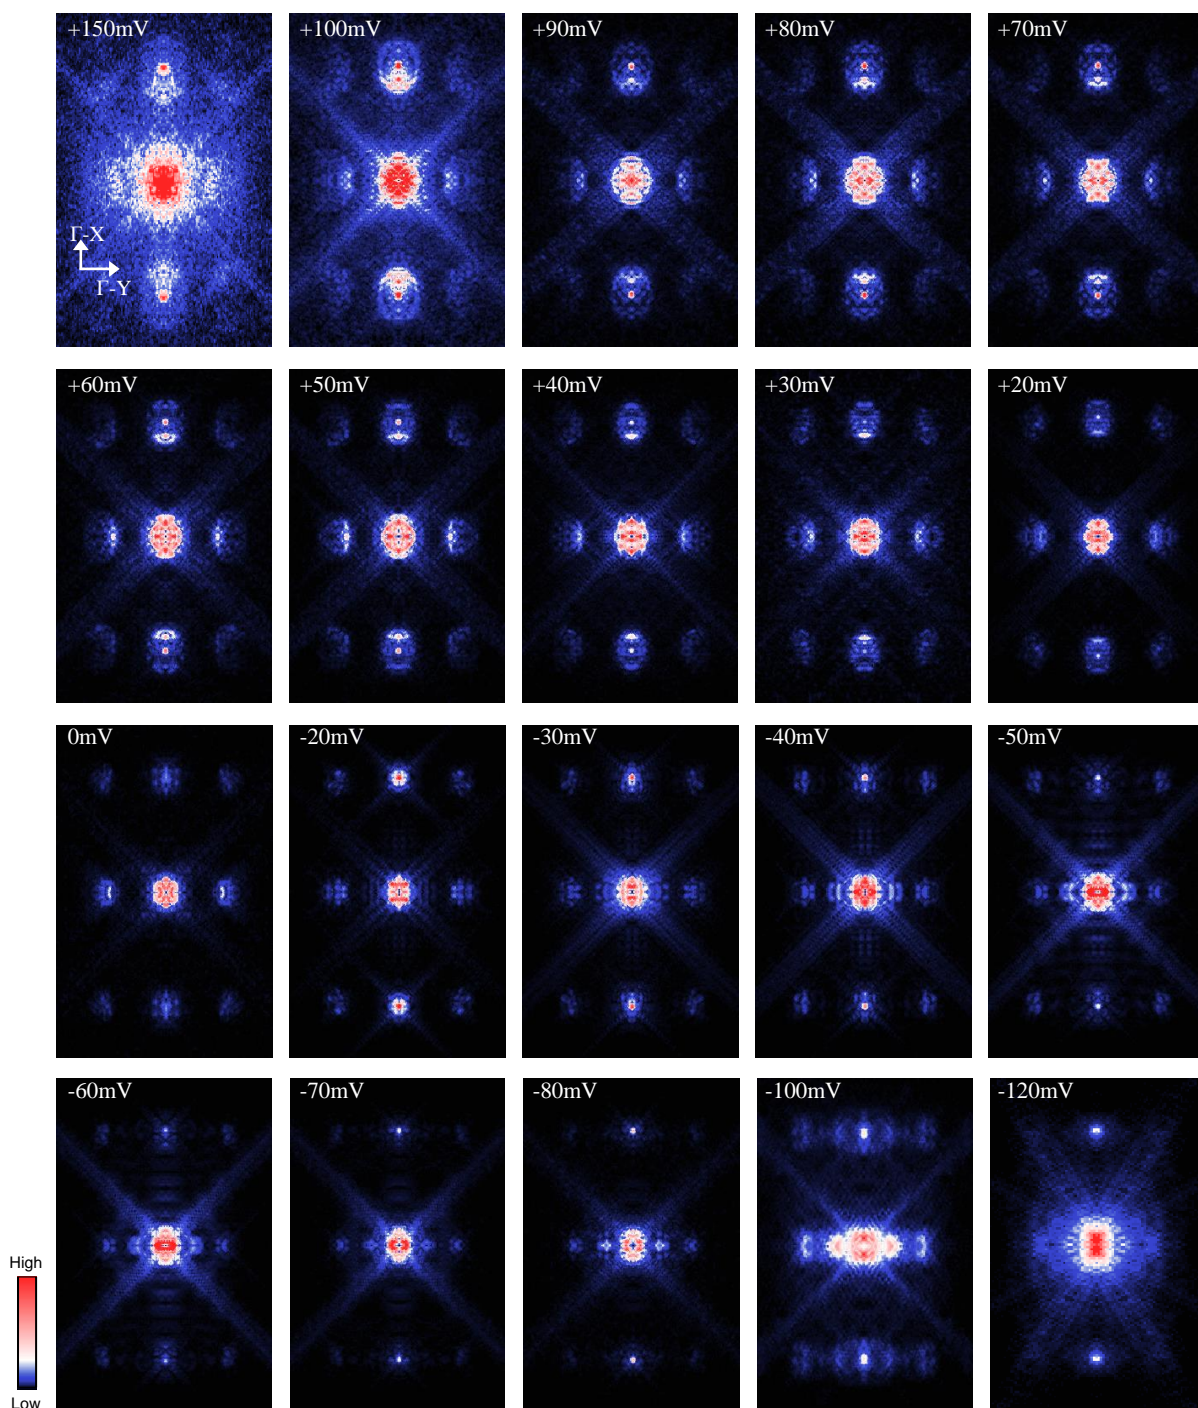

**Supplementary Figure 5.** FFT images showing the evolution of the QPI patterns with bias voltage. The bias voltage is labeled in each image. All the FFT images are symmetrized and drift-corrected.

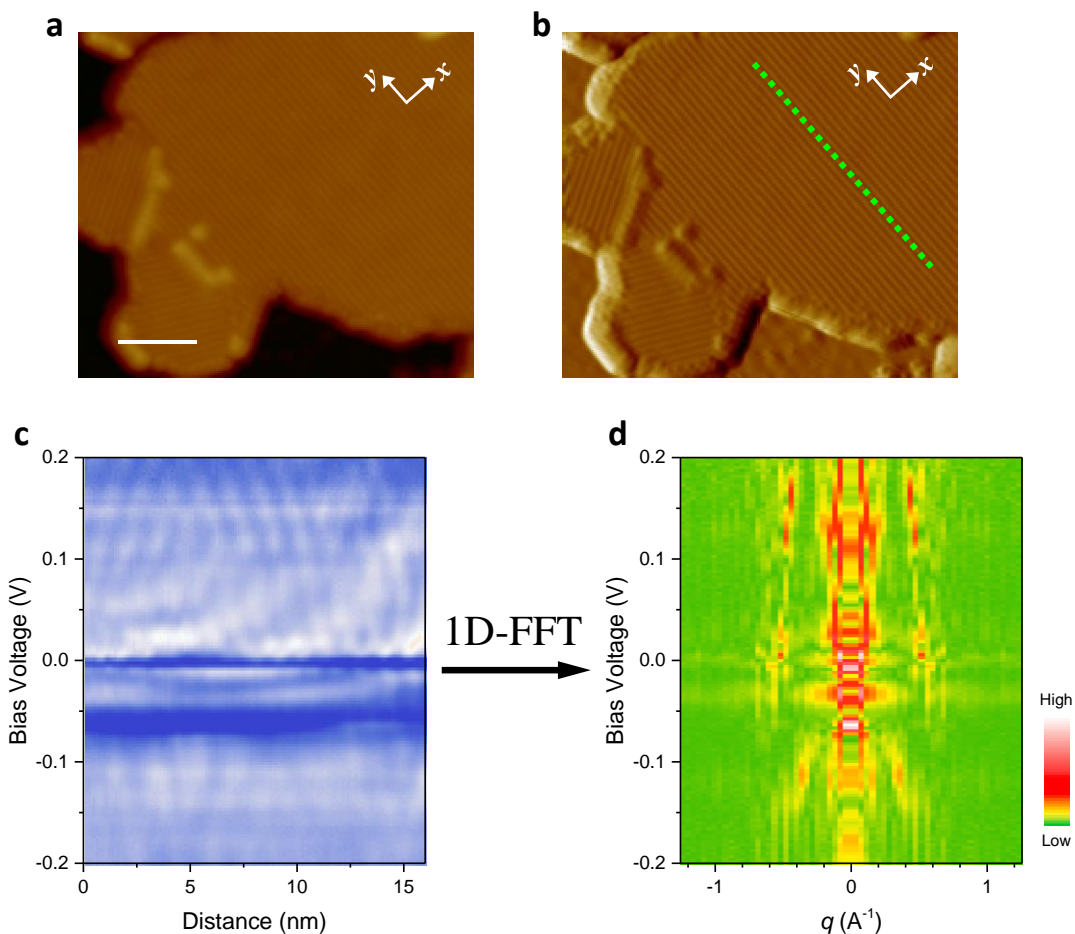

**Supplementary Figure 6.** Line-scan  $dI/dV$  spectra taken along the y-axis.

(a) STM topographic images ( $U = +1.0$  V,  $I_t = 100$  pA) of the area for the line-scan  $dI/dV$  spectroscopic measurement taken along the y-axis. The scale bar is 6.4 nm. (b) Differential images of (a) showing clearly the row direction. The green dotted line marks the positions where the line-scan  $dI/dV$  spectra are taken. (c) The corresponding  $dI/dV$  spectroscopic map ( $U = +100$  mV,  $I_t = 200$  pA) taken along the green line in (b). (d) The 1D FFT image of (c).

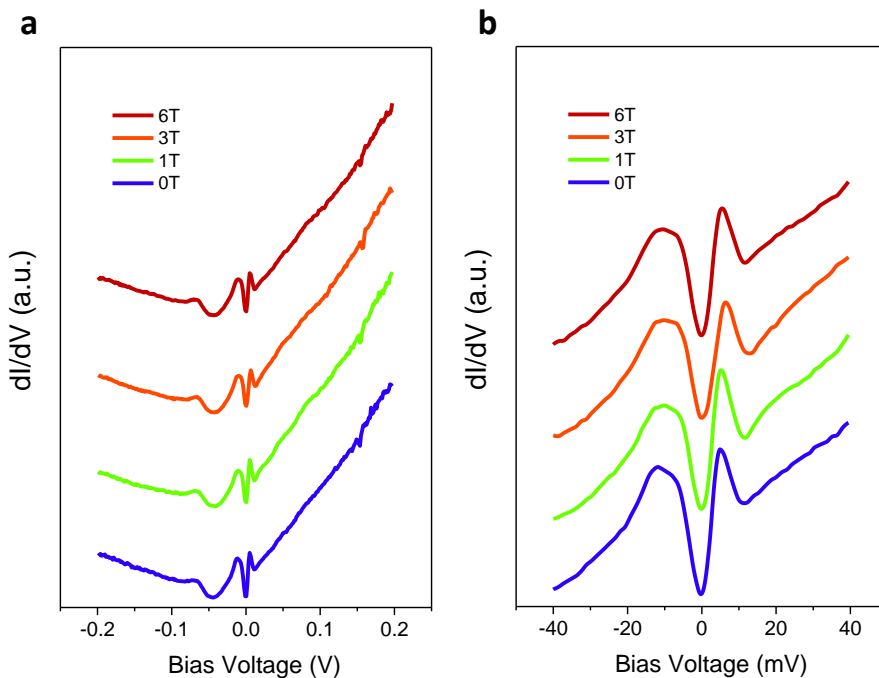

**Supplementary Figure 7.** Magnetic field dependence of  $dI/dV$  spectra. The  $dI/dV$  spectra are measured at a specific lattice site on the  $1T'$ - $WTe_2$  terrace under the magnetic field up to 6 T. The magnetic field is applied perpendicular to the surface (along  $c$  axis). (a) Large energy scale  $dI/dV$  spectra ( $U = +100$  mV,  $I_t = 300$  pA) ; (b) Small energy scale  $dI/dV$  spectra ( $U = +40$  mV,  $I_t = 200$  pA).



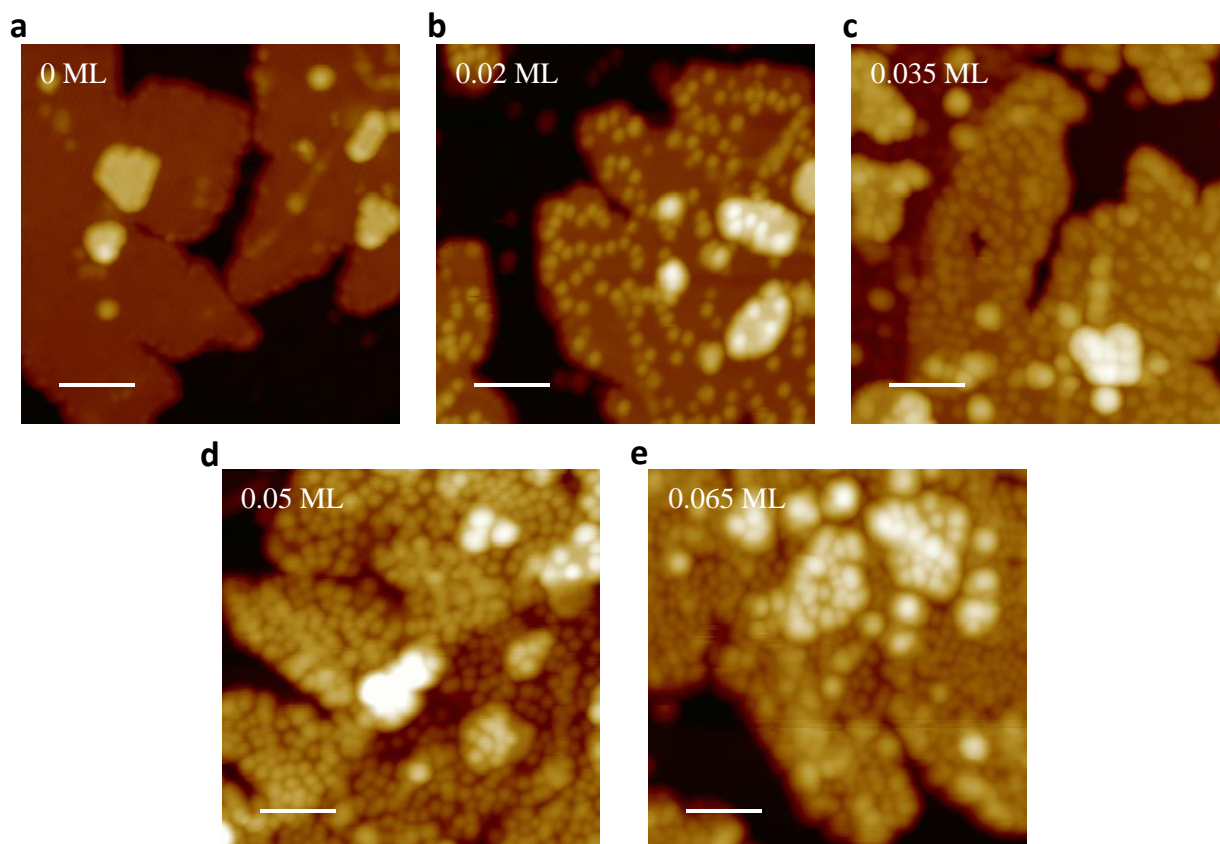

**Supplementary Figure 8.** Surface morphology of single layer  $1T'$ - $\text{WTe}_2$  upon K deposition. (a) STM topographic image of the clean surface of  $1T'$ - $\text{WTe}_2$  islands ( $U = +2.0$  V,  $I_t = 100$  pA). The scale bar is 8 nm. (b)~(e) STM topographic images ( $U = +1.0$  V,  $I_t = 100$  pA) of  $1T'$ - $\text{WTe}_2$  islands after potassium deposition. The scale bar is 8 nm. The coverage of the potassium is labeled in each image.

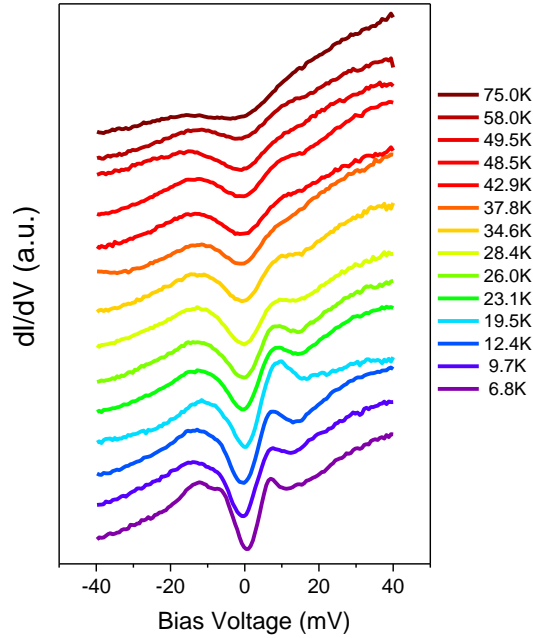

**Supplementary Figure 9.** Evidence of the existence of the gap at Fermi level at elevated temperatures up to  $\sim 75$  K. The  $dI/dV$  tunneling spectra ( $U = +40$  mV,  $I_t = 200$  pA) are taken at a specific lattice site on the  $1T'$ -WTe<sub>2</sub> terrace. The gap shape at the Fermi level can be clearly identified at temperatures up to  $\sim 75$  K.

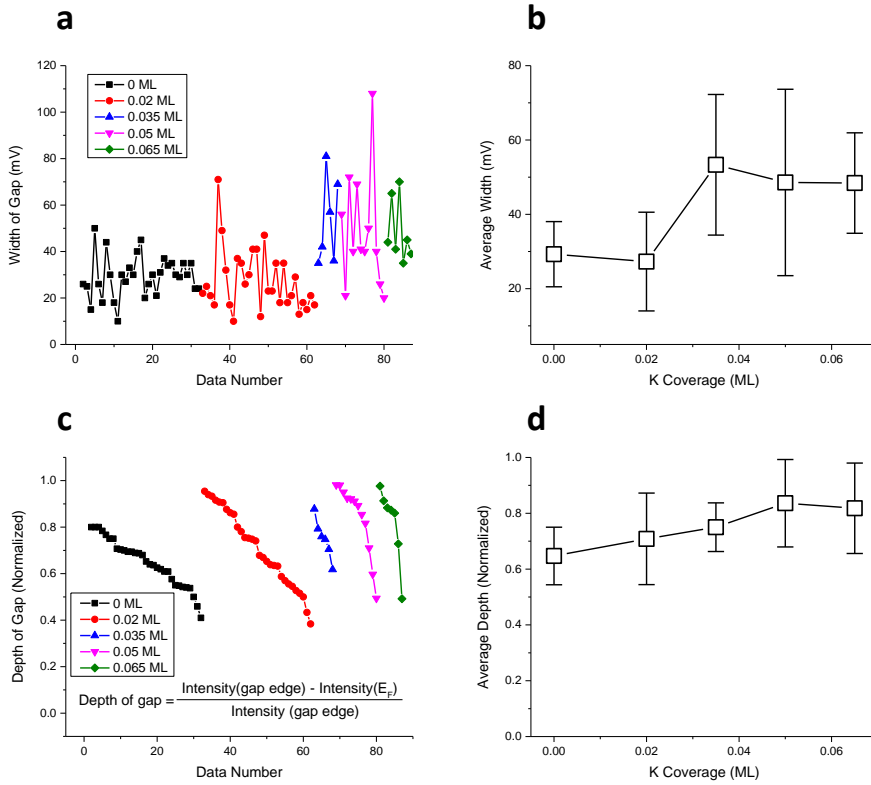

**Supplementary Figure 10.** Statistical results of the gap width and depth at various K coverage. The depth is defined as  $dI/dV(E_F) / dI/dV(\text{gap edge})$ . (a) Measured gap width at various K coverage. Each dot represents a measured value on a  $dI/dV$  spectrum. The different colors mark the different K coverage. (b) Average width of the gap at various K coverage. The average gap width shows a trend to increase. (c) Measured gap depth at various K coverage. Each dot represents a calculated value on a  $dI/dV$  spectrum. The different colors mark the different K coverage. (d) Average depth of gap at various K coverage. The average gap depth shows a trend to decrease, meaning the gap becomes deeper.

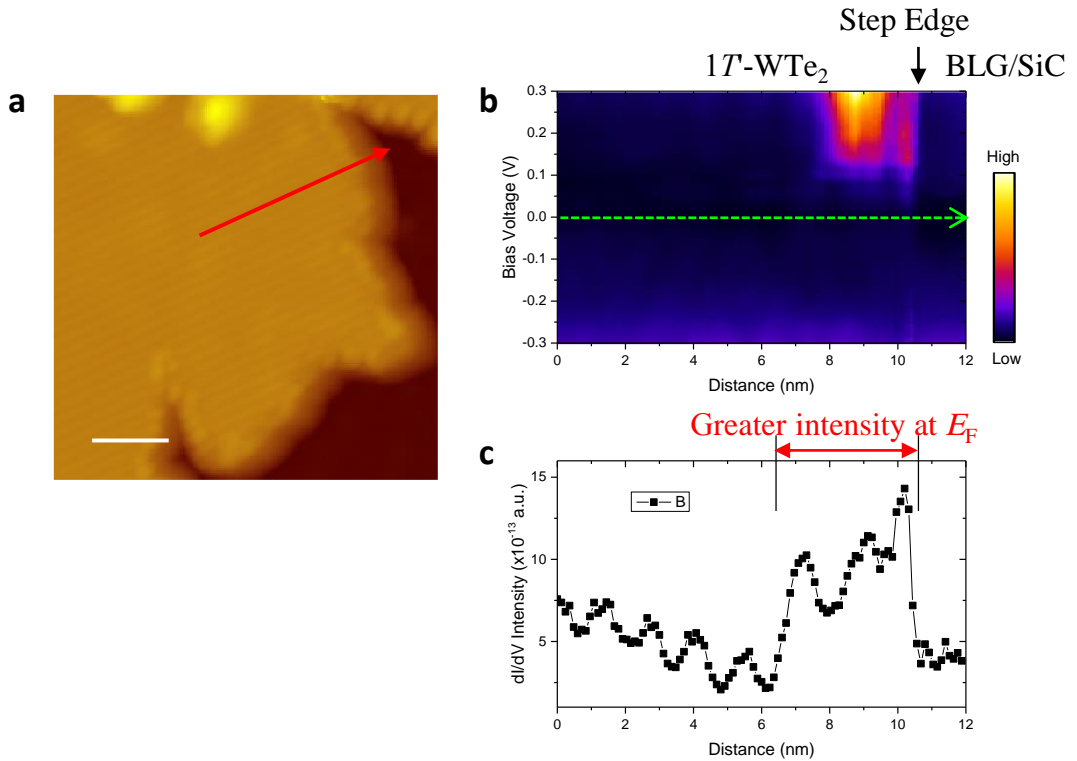

**Supplementary Figure 11.** Characterization of the edge state at the  $1T'$ - $WTe_2$  step edge. (a) STM image ( $U = +1.0$  V,  $I_t = 100$  pA) of the single-layer  $1T'$ - $WTe_2$  island grown on Graphene/SiC substrate. The scale bar corresponds to 4 nm. (b)  $dI/dV$  spectra ( $U = +200$  mV,  $I_t = 200$  pA) taken along the red arrowed line in (a) and shown in 2D color mode. The x axis represent the location, and the y axis the Bias voltage. The  $dI/dV$  intensity is represented by the colored map. (c) The line-cut profile taken along the green arrowed line in (b) showing the location dependent  $dI/dV$  intensity at Fermi energy.
